# Supplementary material for: Polyaniline–ionic liquid derived ordered mesoporous carbon nanocomposite: synthesis and supercapacitive behavior
Source: Royal Society of Chemistry journal article supplement (doi:10.1039/c5ra09136e), 2015-01-01
Supplement: c5ra09136e1.pdf [file c5ra09136e1.pdf]

**2<sup>nd</sup> August 2017 Update: Please note that this version of the Supporting information replaces the version that was originally published on 12<sup>th</sup> August 2015.**

The authors regret that the original version of Figure S1 duplicated images from *J. Phys. Chem. C*, 2011, 115 (47), 23584–23590. Figure S1 has now been replaced with a corrected figure containing images that are original to this study.

## Supporting information

### **Polyaniline-Ionic Liquid Derived Ordered Mesoporous Carbon Nanocomposite: Synthesis and Its Supercapacitive Behavior**

Sayed Habib kazemi <sup>\*,a,b</sup>, Babak Karimi <sup>\*,a</sup>, Siamak Abdollahi Aghdam <sup>a</sup>, Mohammad Ali Kiani<sup>c</sup>

<sup>a</sup> *Department of Chemistry, Institute for Advanced Studies in Basic Sciences (IASBS), Zanjan 45137-66731, Iran*

<sup>b</sup> *Center for Research in Climate Change and Global Warming (CRCC), Institute for Advanced Studies in Basic Sciences (IASBS), Zanjan 45137-66731, Iran*

<sup>c</sup> *Chemistry & Chemical Engineering Research Center of Iran, P.O. Box 14335-186, Tehran-Iran*

*E-mail addresses: [habibkazemi@iasbs.ac.ir](mailto:habibkazemi@iasbs.ac.ir) and [karimi@iasbs.ac.ir](mailto:karimi@iasbs.ac.ir)*

**Table S1.** Electrochemical observations used to choose the best aniline to IOMC ratio for nanocomposite fabrication (Voltammetry at a scan rate of 5 mV s<sup>-1</sup> in 1M of H<sub>2</sub>SO<sub>4</sub>)

| IOMC (mg) | aniline (mg) | (IOMC:aniline) weight ratio | C (F g <sup>-1</sup> )                     |
|-----------|--------------|-----------------------------|--------------------------------------------|
| 16.8      | 70           | 0.24                        | 511                                        |
| 16.8      | 42           | 0.42*                       | 542                                        |
| 24        | 20           | 1.2                         | 278.98                                     |
| 12        | 5            | 2.4                         | 317                                        |
| 25        | 5            | 5                           | 200<br>(close to capacitance of pure IOMC) |

\*Maximum capacitance was obtained for IOMC:aniline ratio of 0.42.

**Table S2.** Supercapacitive behavior of two electrode supercapacitor system assembled using two identical PANi@IOMC electrodes (Capacitances were estimated for a single electrode).

| $v$ (mV s <sup>-1</sup> ) | C (F g <sup>-1</sup> ) |
|---------------------------|------------------------|
| 5                         | 444                    |
| 10                        | 365                    |
| 20                        | 286                    |
| 50                        | 218                    |
| 75                        | 197                    |

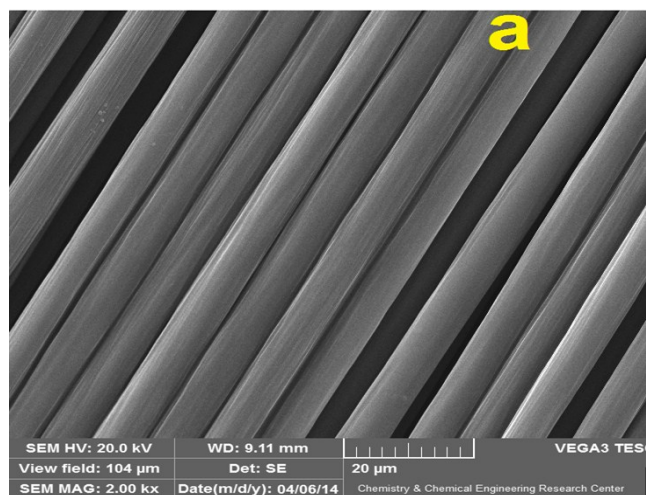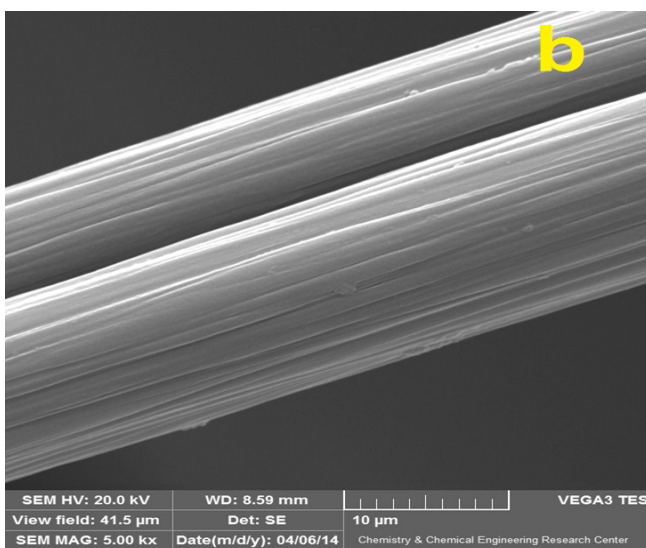

**Figure S1.** FESEM images of (a) carbon fiber (CF) and (b) electro-etched carbon fiber (ECF)

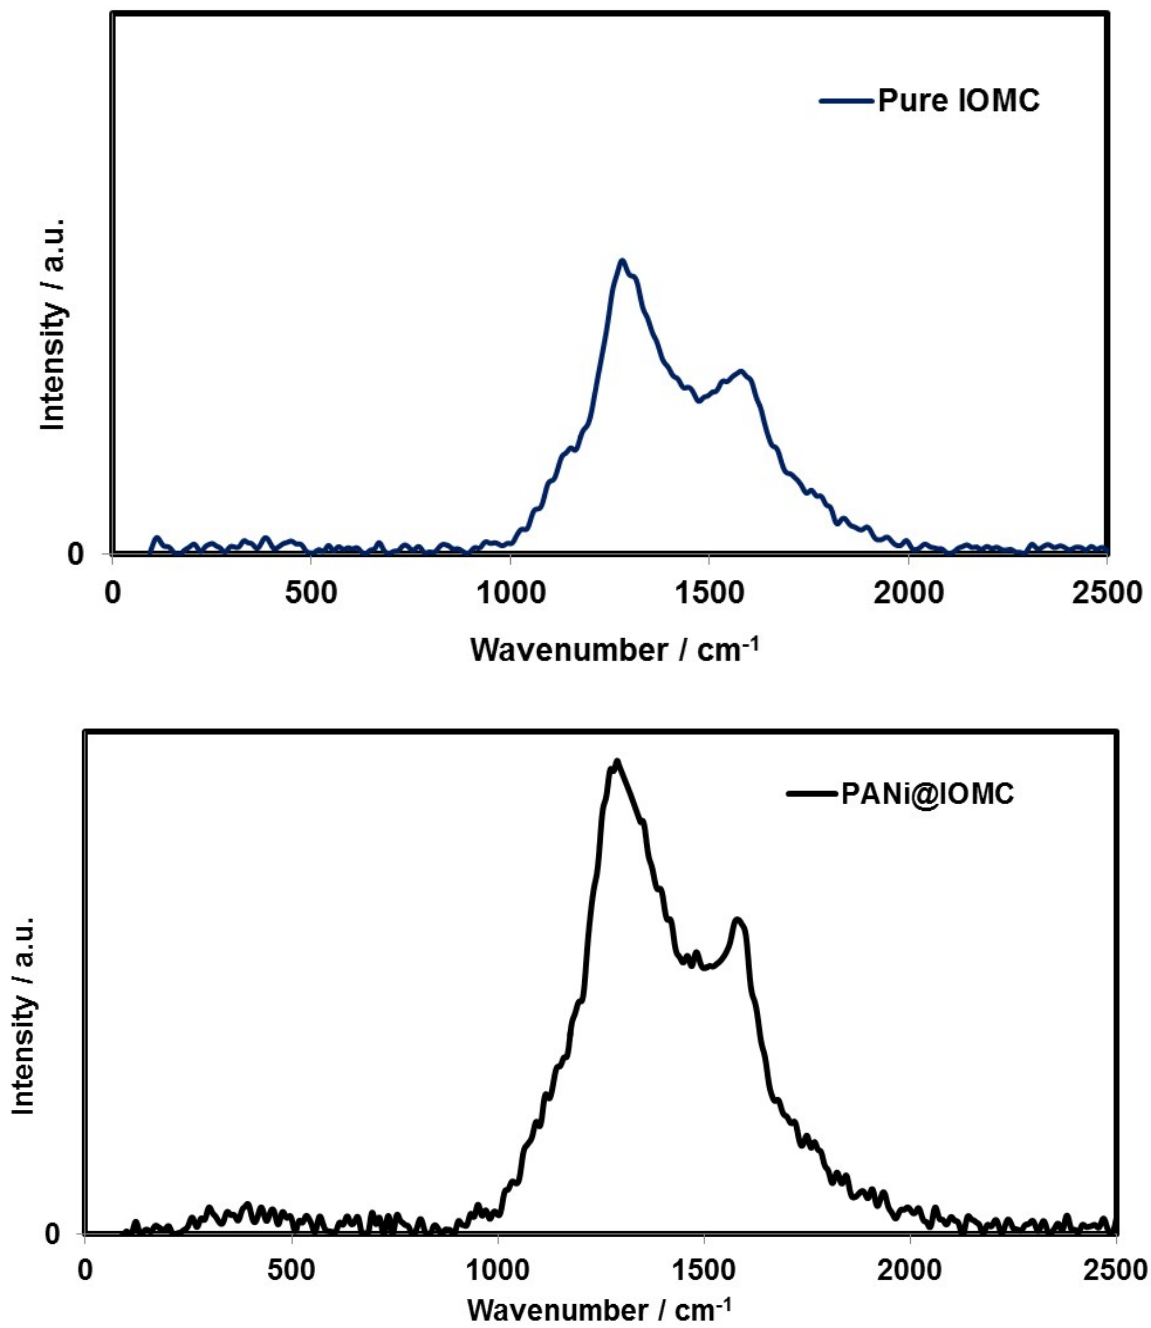

**Figure S2.** Raman spectra recorded for IOMC (a) and PANi@IOMC (b) materials

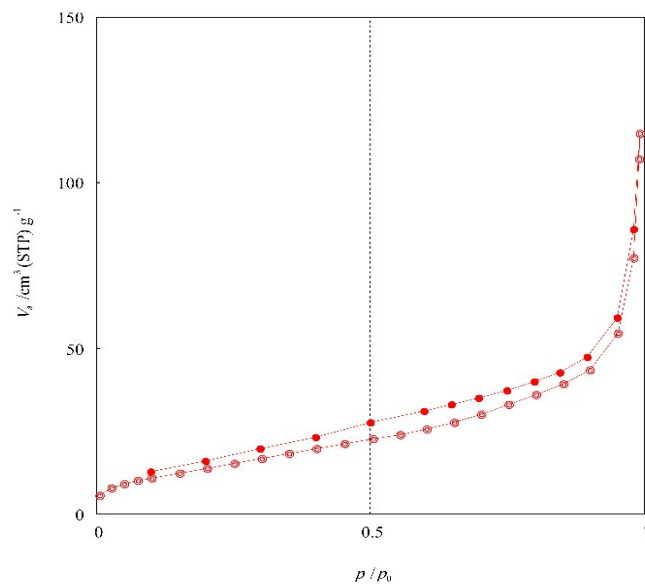

**Figure S3.**  $\text{N}_2$  adsorption–desorption isotherm recorded for PANi@IOMC

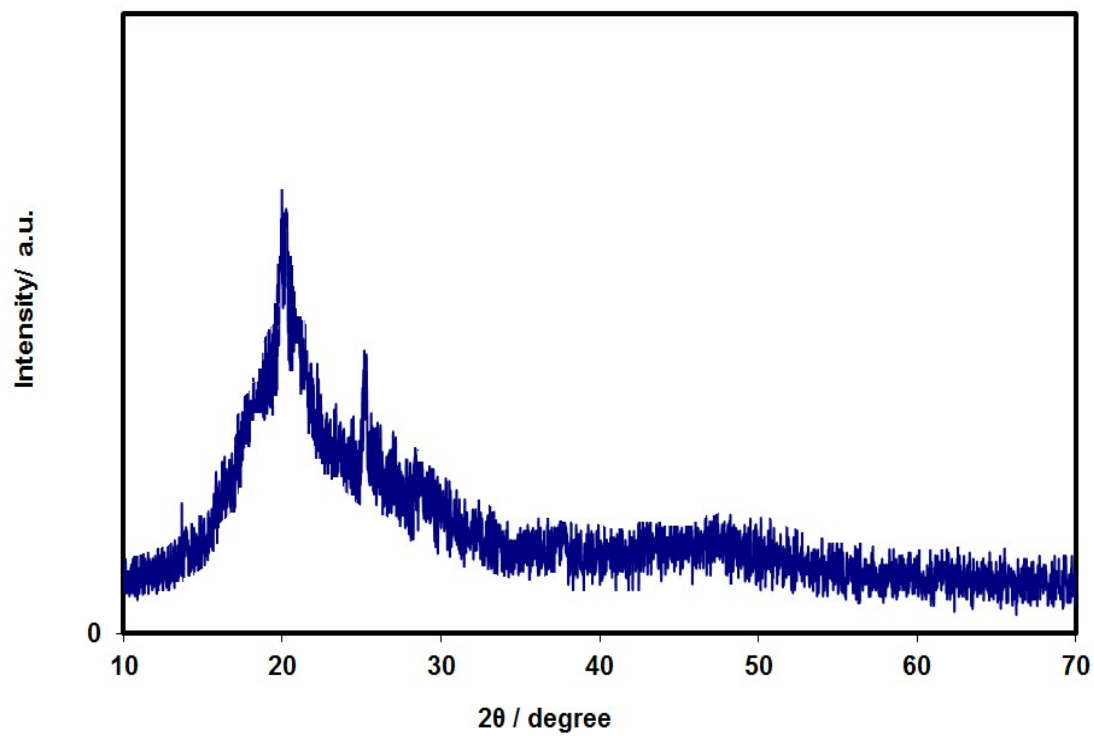

**Figure S4.** XRD spectrum recorded for PANi@IOMC nanocomposite

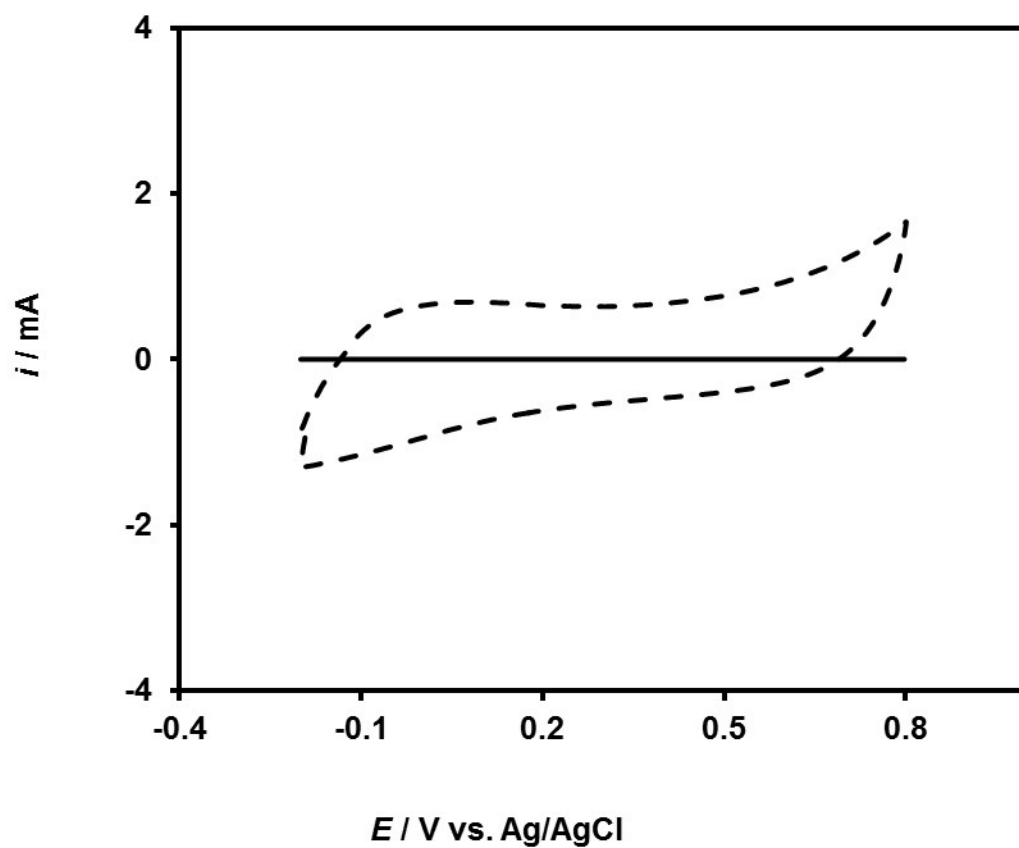

**Figure S5.** Cyclic voltammograms recorded for carbon fiber substrate before (solid line) and after electro-etching (dashed line curve)

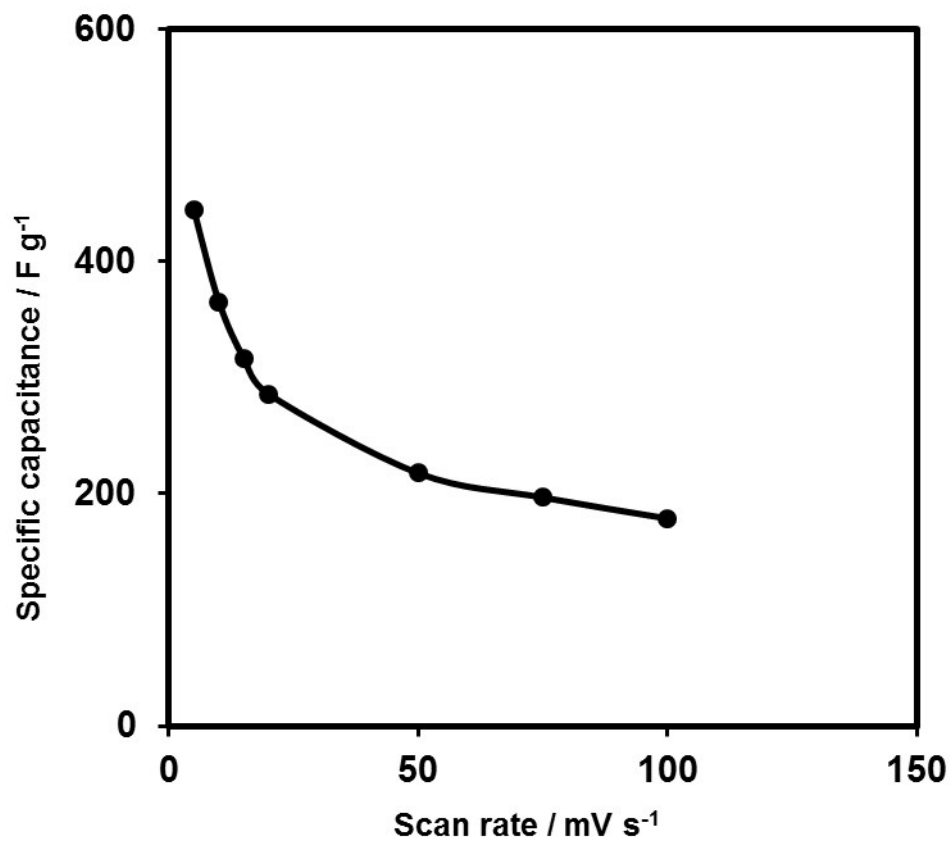

**Figure S6.** Electrochemical behavior of symmetric two electrodes supercapacitor constructed using two identical PANi@IOMC electrodes (Capacitances were estimated for a single electrode)
